# Supplementary material for: Development of a centralised national AED (automated external defibrillator) network across all ambulance services in the United Kingdom
Source: PubMed Central journal article supplement — Resusc Plus. 2024 Aug 21;19:100729. doi: 10.1016/j.resplu.2024.100729 (PMC11382004; doi:10.1016/j.resplu.2024.100729), 2024-08-21
Supplement: mmc2.pdf [file mmc2.pdf]

Email Communication to Guardians

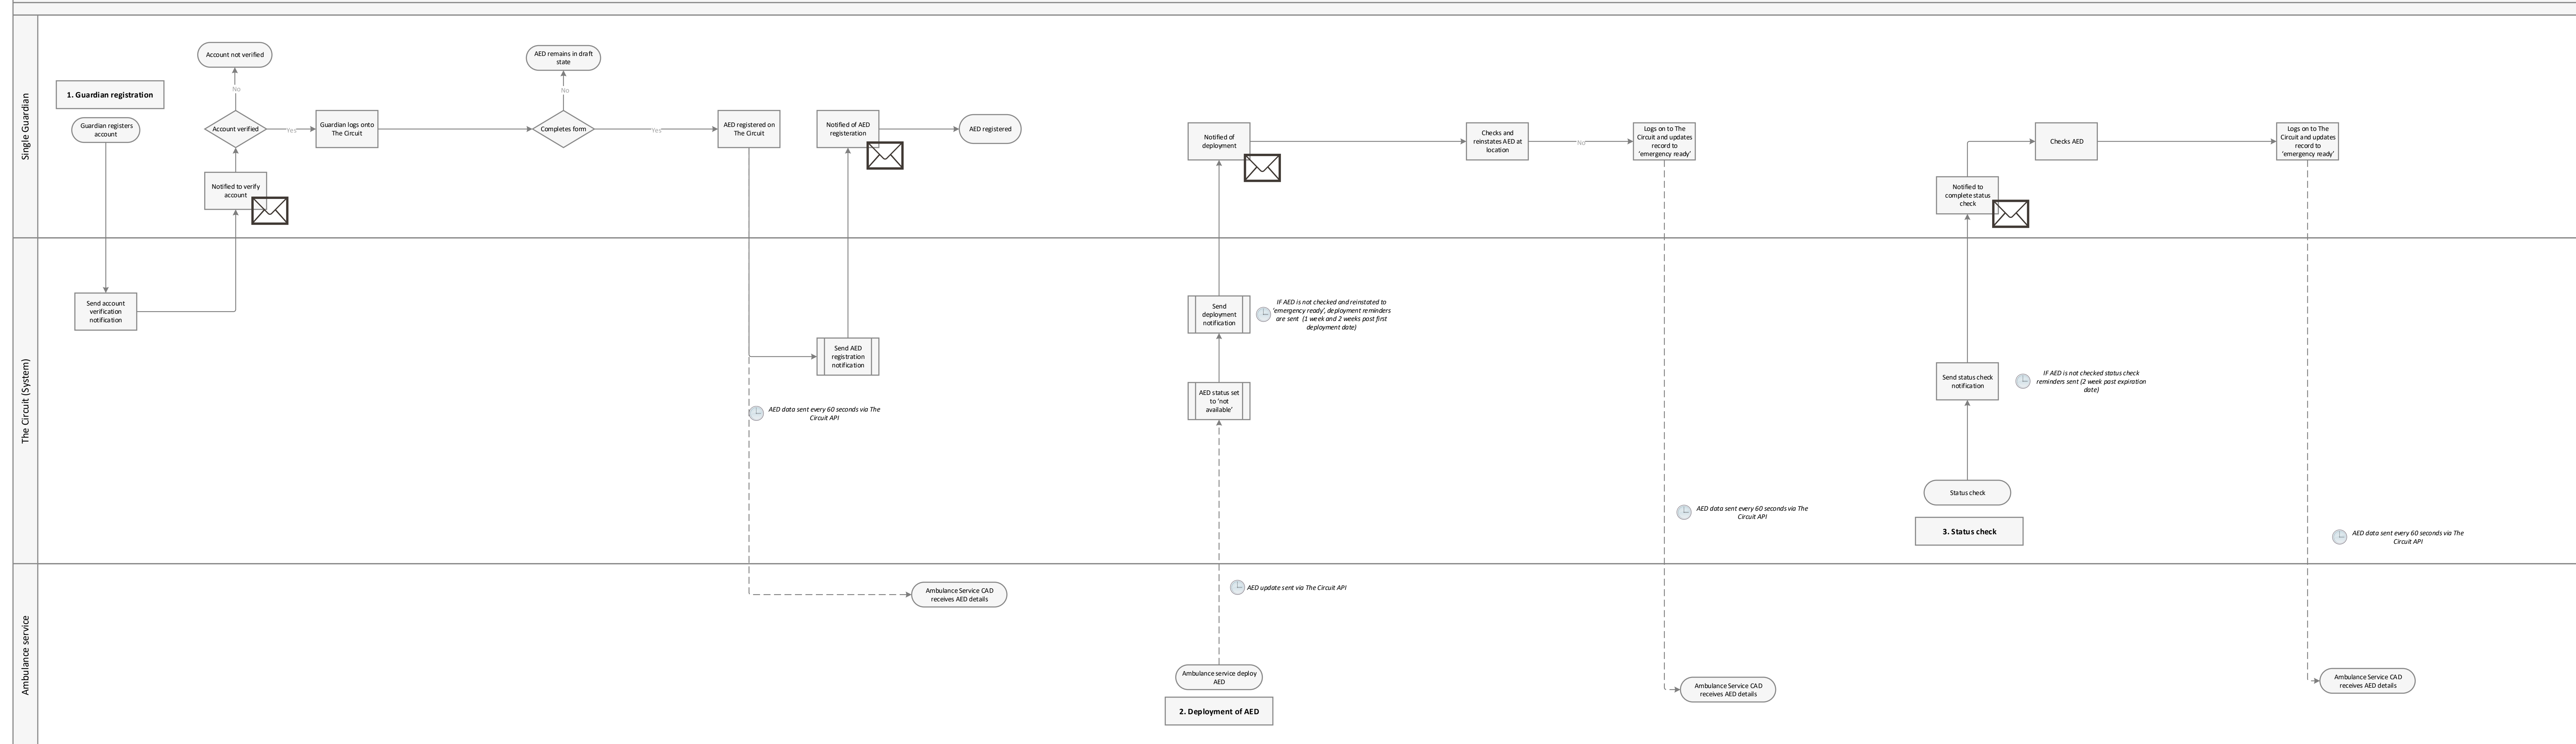

**Keys**

- ⌚ Processing time
- Data shared via API
- ✉ Email notification
